# Supplementary material for: Cloning, expression and characterisation of short-chain dehydrogenase/reductase SDR12 (A0A7I5E7J1) from a parasitic nematode Haemonchus contortus
Source: Research Square preprint supplement (doi:10.21203/rs.3.rs-7362067/v1), 2025-09-08
Supplement: Supplementary file 1 [file 75600004e6b217e351a9bcce.docx]

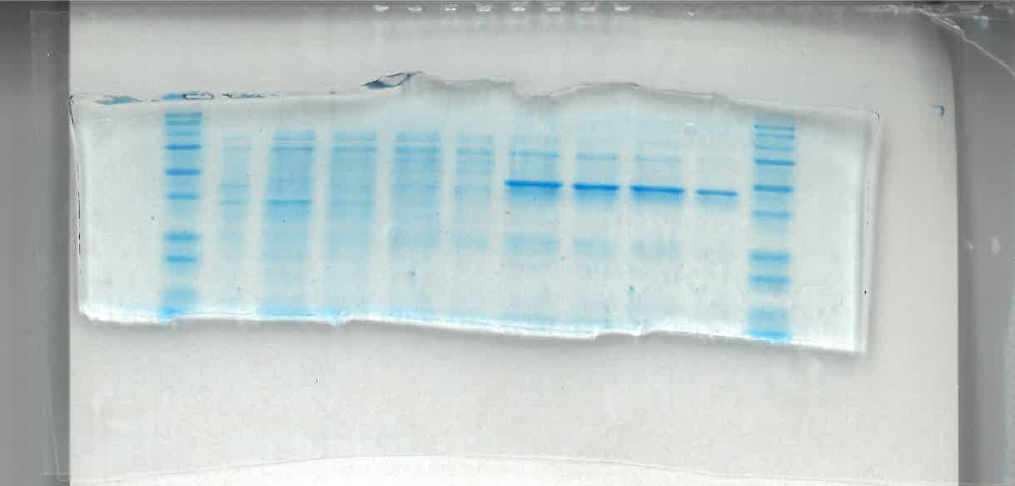


**Fig. S4** –SDS-PAGE analysis of purified fractions - full gell image corresponding to the **Fig. 2A** in the main text of the manuscript.


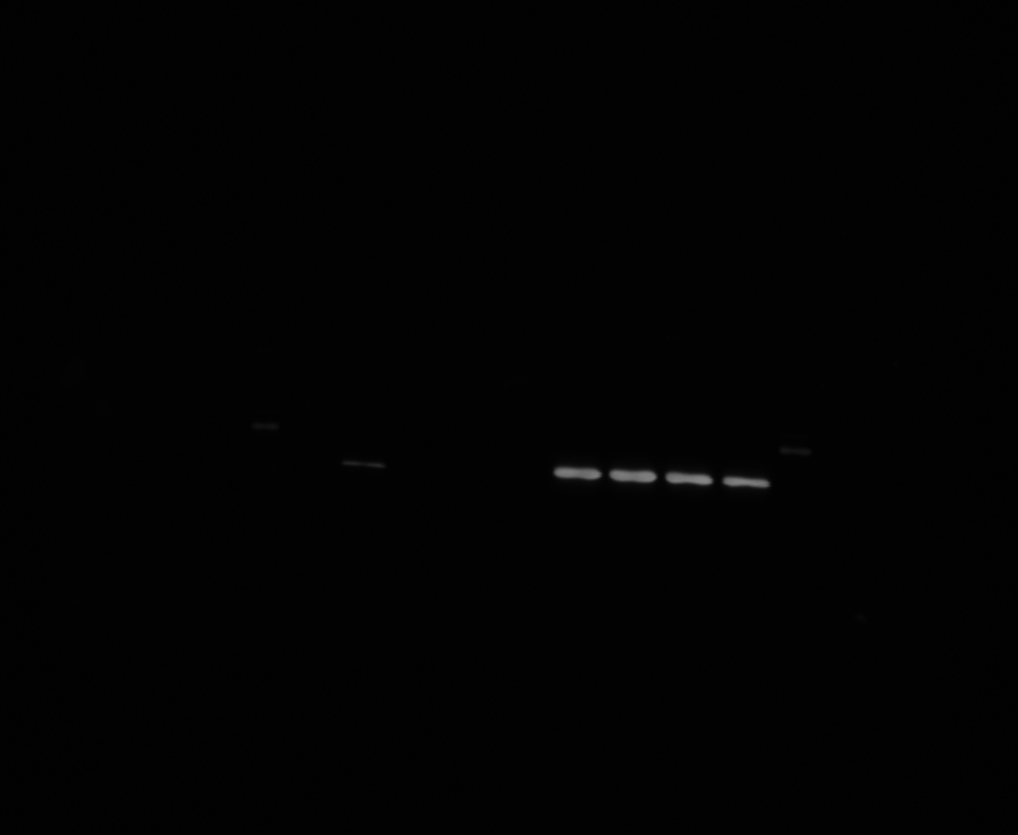


**Fig. S5** Western blot – full image as taken, corresponding to **Fig. 2B** in the main text of the manucript. Confirmed the presence of the *Hco_*SDR12 (~45.09 kDa). A distinct band of the expected molecular weight was detected, with the strongest signal observed in the elution fractions (samples 6–9). A weaker signal was also visible in the unpurified sample (sample 1), indicating partial presence of the protein before purification.
